## Practice Advisory for Preanesthesia Evaluation

### A Report by the American Society of Anesthesiologists Task Force on Preanesthesia Evaluation

PRACTICE advisories are systematically developed reports that are intended to assist decision-making in areas of patient care where scientific evidence is insufficient to develop an evidence-based model. Practice advisories provide a synthesis of opinion from experts, open forums, and other public sources. Practice advisories report the current state of scientific literature, but are not supported by literature to the same degree as standards or guidelines due to the lack of sufficient numbers of adequately controlled studies.

Advisories are not intended as guidelines, standards, or absolute requirements. The use of practice advisories cannot guarantee any specific outcome. They may be adopted, modified, or rejected according to clinical needs and constraints. Practice advisories are subject to periodic revision as warranted by the evolution of medical knowledge, technology, and practice.

#### Definition of Preanesthesia Evaluation

The literature does not provide a standard definition for preanesthesia evaluation. For this Practice Advisory, the preanesthesia evaluation is defined as the process of clinical assessment that precedes the delivery of anesthesia care for surgery and for nonsurgical procedures. The preanesthesia evaluation is the responsibility of the anesthesiologist.

Preanesthesia evaluation consists of the consideration of information from multiple sources that may include

the patient's medical records, interview, physical examination, and findings from medical tests and evaluations. As part of the preanesthesia evaluation process, the anesthesiologist may choose to consult with other healthcare professionals to obtain information or services that are relevant to perioperative anesthetic care. Preoperative tests, as a component of the preanesthesia evaluation, may be indicated for various purposes, including but not limited to (1) discovery or identification of a disease or disorder that may affect perioperative anesthetic care, (2) verification or assessment of an already known disease, disorder, medical or alternative therapy that may affect perioperative anesthetic care, and (3) formulation of specific plans and alternatives for perioperative anesthetic care. For this Advisory, *perioperative* refers to the care surrounding operations and procedures.

The assessments made in the process of a preanesthesia evaluation may be used to educate the patient, organize resources for perioperative care, and formulate plans for intraoperative care, postoperative recovery, and perioperative pain management.

#### Purposes of the Advisory for Preanesthesia Evaluation

The purposes of this Advisory are to (1) assess the currently available evidence pertaining to the healthcare benefits of preanesthesia evaluation, (2) offer a reference framework for the conduct of preanesthesia evaluation by anesthesiologists, and (3) stimulate research strategies that can assess the healthcare benefits of a preanesthesia evaluation.

Additional material related to this article can be found on the ANESTHESIOLOGY Web site. Go to the following address, click on Enhancements Index, and then scroll down to find the appropriate article and link. <http://www.anesthesiology.org>

Developed by the Task Force on Preanesthesia Evaluation: L. Reuven Pasternak, M.D. (Chair), Baltimore, Maryland; James F. Arens, M.D., Houston, Texas; Robert A. Caplan, M.D., Seattle, Washington; Richard T. Connis, Ph.D., Woodinville, Washington; Lee A. Fleisher, M.D., Baltimore, Maryland; Richard Flowerdew, M.B., Portland, Maine; Barbara S. Gold, M.D., Minneapolis, Minnesota; James F. Mayhew, M.D., League City, Texas; David G. Nickinovich, Ph.D., Bellevue, Washington; Linda Jo Rice, M.D., St. Petersburg, Florida; Michael F. Roizen, M.D., Chicago, Illinois; Rebecca S. Twersky, M.D., Brooklyn, New York

Submitted for publication November 5, 2001. Accepted for publication November 5, 2001. Support was provided by the American Society of Anesthesiologists, under the direction of James F. Arens, M.D., Chair of the Committee on Practice Parameters. Approved by the House of Delegates, October 17, 2001.

The accompanying Web site enhancement is a bibliography.

Address reprint requests to American Society of Anesthesiologists, 520 North Northwest Highway, Park Ridge, Illinois 60068-2573.

#### Focus

A preanesthesia evaluation is considered a basic element of anesthesia care. Therefore, the focus of this Advisory is the assessment of evidence pertaining to the content and timing of a preanesthesia evaluation. The interactions between the preanesthesia evaluation, preoperative testing, and perioperative care are beyond the scope and mandate of the Task Force. Informed consent, often undertaken at the same time as the preanesthesia evaluation, is also beyond the scope of this Advisory.

## Application

This Advisory is intended for use by anesthesiologists and those who provide care under the direction of an anesthesiologist. The Advisory applies to patients of all ages who are scheduled to receive general anesthesia, regional anesthesia, moderate or deep sedation for elective surgical and nonsurgical procedures. The Advisory does not address the selection of anesthetic technique nor the preanesthesia evaluation of patients requiring urgent or emergency surgery or anesthetic management provided on an urgent basis in other locations (*e.g.*, emergency rooms).

## Criteria for Anesthesia Intervention, Testing, and Consultation

Any evaluations, tests, and consultations required for a patient are done with the reasonable expectation that such activities will result in benefits that exceed the potential adverse effects. Potential benefits may include a change in the content or timing of anesthetic management or perioperative resource utilization that may improve the safety and effectiveness of anesthetic processes involved with perioperative care. Potential adverse effects may include interventions that result in injury, discomfort, inconvenience, delays, or costs that are not commensurate with the anticipated benefits.

## Task Force Members and Consultants

The American Society of Anesthesiologists (ASA) appointed a task force of 12 members to (1) review published evidence; (2) obtain expert and public consensus opinion; and (3) create a consensus-based assessment of currently available scientific literature and opinion. The ASA Task Force members consisted of anesthesiologists in both private and academic practices from various geographic areas of the United States, and methodologists from the ASA Committee on Practice Parameters.

The Task Force used a six-step process. First, they reached consensus on the criteria for evidence of effectiveness of preanesthesia evaluation. Second, original published research studies relevant to these issues were reviewed. Third, consultants who had expertise or interest in preanesthesia evaluation, and who practiced or worked in various settings (*e.g.*, academic and private practice) were asked to (1) participate in opinion surveys on the effectiveness of various preanesthesia evaluation strategies, and (2) review and comment on draft reports of the Task Force. Fourth, opinions about various elements of this Practice Advisory were solicited from a random sample of active members of the ASA. Fifth, the Task Force held several open forums at major national anesthesia meetings to solicit input on the key concepts

of this Advisory. Sixth, all available information was used to build consensus within the Task Force on the Advisory.

## Availability and Strength of Evidence

Practice advisories are developed by a systematic, consensus-based process. In contrast to evidence-based guidelines, practice advisories lack the support of a sufficient number of adequately controlled scientific studies to permit aggregate analyses of data with rigorous statistical techniques such as meta-analysis. Nonetheless, literature-based evidence for practice advisories is available from limited controlled trials, case reports, descriptive studies, and by the assessment of the strengths and weaknesses of published studies. This literature often permits the identification of recurring patterns of clinical practice. Opinion surveys often reveal similar patterns. The advisory statements contained in a practice advisory represent a consensus-based distillation of the clearest patterns of agreement or disagreement.

## Advisory Statements

### Preanesthesia History and Physical Examination

**Impact.** A preanesthesia history and physical examination precedes the ordering, requiring, or performance of specific preanesthesia tests, and consists of (1) evaluation of pertinent medical records, (2) patient interview(s), and (3) physical examination. No controlled trials of the clinical impact of performing a preanesthesia medical records review or physical examination were found. Several studies reported specific perioperative outcomes (*e.g.*, cardiac, respiratory, renal, hemorrhagic) occurring in patients with specific preexisting conditions (*e.g.*, hypertension, previous myocardial infarction, smoking, pulmonary disease, and age).<sup>1-63</sup> Such conditions often are noted in a patient's medical record. Additional studies were examined that reported preexisting conditions (*e.g.*, airway abnormalities, cardiopulmonary disorders) detected during a preanesthesia examination or interview.<sup>6,28,44,47,49,59,64-91</sup> Five of these studies resulted in changes in resource management.<sup>49,64,74,82,84</sup> These studies were not controlled trials and were not considered sufficiently rigorous to provide unequivocal evidence of the value of performing a preanesthetic medical records review or physical examination.

#### *Advisory*

The Task Force believes that the assessment of anesthetic risks associated with the patient's medical condi-

**Table 1. Timing of the Initial Assessment of Pertinent Medical Records—Survey Opinions**

| Surgical Invasiveness           | High                    |                          | Medium                  |                          | Low                     |                          |
|---------------------------------|-------------------------|--------------------------|-------------------------|--------------------------|-------------------------|--------------------------|
|                                 | Consultants<br>(N = 72) | ASA Members<br>(N = 234) | Consultants<br>(N = 72) | ASA Members<br>(N = 231) | Consultants<br>(N = 72) | ASA Members<br>(N = 233) |
| Prior to the day of surgery     | 89%                     | 75%                      | 58%                     | 33%                      | 17%                     | 11%                      |
| On or before the day of surgery | 11%                     | 24%                      | 39%                     | 61%                      | 69%                     | 59%                      |
| Only on the day of surgery      | 0%                      | 1%                       | 3%                      | 6%                       | 14%                     | 30%                      |

ASA = American Society of Anesthesiologists.

tions, therapies, alternative treatments, surgical and other procedures, and of options for anesthetic techniques is an essential component of basic anesthetic practice. Benefits may include, but are not limited to, the safety of perioperative care, optimal resource utilization, improved outcomes, and patient satisfaction.

**Timing.** The activities encompassed by a preanesthesia history and physical examination occur over a variable period of time. The timing of an initial preanesthesia evaluation is guided by such factors as patient demographics, clinical conditions, type and invasiveness of procedure, and the nature of the healthcare system. Three options that practices utilize for the timing of an initial preanesthesia evaluation are (1) always prior to the day of surgery, (2) either on or before the day of surgery, and (3) only on the day of surgery.

Although no controlled trials addressing the timing of a preanesthesia evaluation were found, survey opinions from expert consultants and a random sample of ASA members were obtained to examine potential clinical influences (*i.e.*, patient severity of disease and surgical invasiveness) on timing decisions. Consultant and ASA member opinions regarding the timing of an initial assessment of pertinent medical records for high, medium, and low levels of surgical invasiveness, independent of medical condition, are reported in table 1. The majority of consultants and ASA members agree that, for high surgical invasiveness, the initial assessment of pertinent

medical records should be done prior to the day of surgery by anesthesia staff. For medium surgical invasiveness, the majority of consultants indicate that the initial assessment of pertinent medical records should be done prior to the day of surgery by anesthesia staff, although the majority of ASA members indicate that the initial assessment may be done on or before the day of surgery. For low surgical invasiveness, the majority of consultants and ASA members agree that the initial assessment may be done on or before the day of surgery.

Consultant and ASA membership opinions regarding the timing of an initial preanesthesia interview and physical examination for high and low severities of disease are reported in table 2. The majority of consultants and ASA members agree that, for patients with high severity of disease, it is preferable that the interview and physical examination be done before the day of surgery by anesthesia staff. For low severity of disease and high surgical invasiveness, consultants and ASA members agree that it is preferable that the interview and physical examination be done prior to the day of surgery. For patients with low severity of disease and medium or low surgical invasiveness, consultants and ASA members agree that the interview and physical examination may be done on or before the day of surgery.

A majority of consultants and the ASA membership, respectively, agree that, *at a minimum*, a preanesthesia physical examination should include (1) an airway exam

**Table 2. Timing of the Preanesthetic Interview and Physical Examination—Survey Opinions**

| High Severity of Disease        | Surgical Invasiveness   |                          |                         |                          |                         |                          |
|---------------------------------|-------------------------|--------------------------|-------------------------|--------------------------|-------------------------|--------------------------|
|                                 | High                    |                          | Medium                  |                          | Low                     |                          |
|                                 | Consultants<br>(N = 72) | ASA Members<br>(N = 232) | Consultants<br>(N = 72) | ASA Members<br>(N = 232) | Consultants<br>(N = 72) | ASA Members<br>(N = 232) |
| Prior to the day of surgery     | 96%                     | 89%                      | 94%                     | 69%                      | 71%                     | 53%                      |
| On or before the day of surgery | 4%                      | 9%                       | 4%                      | 28%                      | 24%                     | 32%                      |
| Only on the day of surgery      | 0%                      | 2%                       | 1%                      | 3%                       | 5%                      | 15%                      |
| Low Severity of Disease         | Surgical Invasiveness   |                          |                         |                          |                         |                          |
|                                 | High                    |                          | Medium                  |                          | Low                     |                          |
|                                 | Consultants<br>(N = 72) | ASA Members<br>(N = 229) | Consultants<br>(N = 72) | ASA Members<br>(N = 229) | Consultants<br>(N = 72) | ASA Members<br>(N = 229) |
| Prior to the day of surgery     | 72%                     | 53%                      | 29%                     | 21%                      | 13%                     | 25%                      |
| On or before the day of surgery | 11%                     | 20%                      | 49%                     | 46%                      | 39%                     | 34%                      |
| Only on the day of surgery      | 15%                     | 11%                      | 21%                     | 34%                      | 47%                     | 56%                      |

ASA = American Society of Anesthesiologists.

(100%, 100%), (2) a pulmonary examination to include auscultation of the lungs (88%, 85%), and (3) a cardiovascular examination (81%, 82%).

### Advisory

The Task Force consensus is that an assessment of readily accessible, pertinent medical records with consultations, when appropriate, should be performed as part of the preanesthesia evaluation prior to the day of surgery for procedures with high surgical invasiveness. For procedures with low surgical invasiveness, the review and assessment of medical records may be done on or before the day of surgery by anesthesia staff. The information obtained may include, but should not be limited to (1) a description of current diagnoses, (2) treatments, including medications and alternative therapies used, and (3) determination of the patient's medical condition(s). Public commentary at open forums and from the Internet corroborates the Task Force consensus.

The Task Force consensus is that an initial record review, patient interview, and physical examination should be performed prior to the day of surgery for patients with high severity of disease. For patients with low severity of disease and undergoing procedures with high surgical invasiveness, the interview and physical exam should also be performed prior to the day of surgery. For patients with low severity of disease undergoing procedures with medium or low surgical invasiveness, the initial interview and physical exam may be performed on or before the day of surgery.

*At a minimum*, a focused preanesthesia physical examination should include an assessment of the airway, lungs, and heart, with documentation of vital signs. Public commentary at open forums and from the Internet corroborate the Task Force opinions.

The Task Force cautions that timing of preanesthesia assessments may not be practical with the current limitation of resources provided by a specific healthcare system or practice environment. The Task Force believes it is the obligation of the healthcare system to, at a minimum, provide pertinent information to the anesthesiologist for the appropriate assessment of the severity of the medical condition of the patient and invasiveness of the proposed surgical procedure well in advance of the anticipated day of the procedure for all elective patients.

### Selection and Timing of Preoperative Tests

Literature regarding controlled trials and test findings regarding the incidence or frequency of commonly used preoperative tests are described below. For purposes of this Advisory, a *routine* test is defined as a test ordered in the absence of a specific clinical indication or purpose. Global designations such as "preop status" or "sur-

gical screening" are not considered as specific clinical indications or purposes. An *indicated* test is defined as a test that is ordered for a specific clinical indication or purpose. For example, assessment of warfarin therapy effects would be considered an indication for specific coagulation studies.

**Electrocardiogram.** Routine electrocardiographic findings were reported as abnormal in 7.0–42.7% of cases (N = 12 studies)<sup>92–103</sup> and led to changes in clinical management in 9.1% of the cases found to be abnormal (N = 1 study).<sup>100</sup> Preoperative electrocardiograms that were ordered as indicated tests resulted in reports of abnormal findings in 4.8–78.8% of cases (N = 17 studies)<sup>49,51,82,100,104–116</sup> and led to changes in clinical management in 2.0–20.0% of the cases found to be abnormal (N = 6 studies).<sup>49,82,100,104,111,112</sup> One observational study with investigator and practitioner blinding found that preoperative electrocardiographic ischemic episodes were associated with intra- and postoperative myocardial infarction for older patients with severe coronary artery disease scheduled for elective coronary artery bypass grafting (CABG).<sup>110</sup> One observational study reported a 10% or greater incidence of coronary events during the subsequent 10 yr for men over 60 without specific clinical indicators and for women over 65 without specific clinical indicators. The incidence increased to 25% in the decade after such patients' seventy-fifth birthday.<sup>107</sup>

**Other Cardiac Evaluation.** No studies were found that examined outcomes from routine preoperative cardiac evaluations of angiography, echocardiography, or stress tests. For patients with indicated cardiac evaluations, abnormal findings were found with angiography: 22.5–47.0% of cases (N = 4 studies)<sup>117–120</sup>; echocardiography: 7.5%–50.0% of cases (N = 5 studies)<sup>121–125</sup>; stress or exercise tests; 15.0–71.0% of cases (N = 3 studies).<sup>105,126,127</sup> Changes in clinical management were not uniformly reported.

**Chest X-ray.** Routine chest x-ray findings were reported as abnormal in 2.5–60.1% of cases (N = 20 studies)<sup>96,98,100,102,128–142</sup> and led to changes in clinical management in 0–51% of the cases found to be abnormal (N = 9 studies).<sup>100,102,128,129,136,139–142</sup> For patients with indicated preoperative chest x-rays, abnormal findings were reported in 7.7–65.4% of cases (N = 18 studies)<sup>30,82,92,100,106,112,128,137,143–152</sup> and led to changes in clinical management in 0.5–74.3% of the cases found to be abnormal (N = 9 studies).<sup>82,100,112,128,143,145–147,152</sup> Two nonrandomized studies compared asymptomatic patients receiving chest x-rays *versus* asymptomatic patients not receiving chest x-rays and found no differences in delays or cancellations of surgery.<sup>141,142</sup> However, the studies found that an abnormal preoperative chest x-ray finding altered care in 8.6% and 9.9% of the cases found to be abnormal.

**Pulmonary Evaluation (i.e., Pulmonary Function Tests, Spirometry).** Studies examining routine pulmonary function tests (PFT's) did not contain data on abnormal findings (N = 2).<sup>46,153</sup> Studies examining routine preoperative spirometry reported abnormal findings in 15.0-51.7% of cases (N = 3 studies).<sup>154-156</sup> Findings for indicated preoperative PFT's were reported as abnormal in 17.0-27.1% of cases (N = 3 studies),<sup>157-159</sup> and indicated preoperative spirometry (a limited form of PFT's) were reported as abnormal in 33.1-45.0% of cases (N = 3 studies).<sup>30,157,160</sup> Changes in clinical management were not reported. No studies were found that reported results of routine preanesthesia office spirometry (i.e., portable or hand held spirometers).

**Hemoglobin and Hematocrit Measurement.** Routine hemoglobin measurements were reported as abnormal in 0.5-43.8% of cases (N = 7 studies)<sup>102,133,161-165</sup> and led to changes in clinical management in 0%-28.6% of the cases found to be abnormal (N = 3 studies).<sup>102,161,164</sup> Indicated hemoglobin measurements were reported as abnormal in 38.6-62.0% of cases (N = 2 studies).<sup>166,167</sup> Changes in clinical management were not reported.

Routine hematocrit measurements were reported as abnormal in 0.2-38.9% of cases (N = 5 studies)<sup>136,162,168-170</sup> and led to changes in clinical management in 0-100% of the cases found to be abnormal (N = 3 studies).<sup>136,168,170</sup> Indicated hematocrit measurements were reported as abnormal in 0.4-5.0% of cases (N = 2 studies).<sup>51,148</sup> Changes in clinical management were not reported.

In studies reporting routine complete blood counts (i.e., individual test results not reported), abnormal findings were reported in 2.9-17.6% of cases (N = 4 studies)<sup>92,98,171-172</sup> and led to changes in clinical management in 2.4% of the cases found to be abnormal (N = 1 study).<sup>172</sup> For indicated complete blood counts, abnormal findings were reported in 6.3-60.8% of cases (N = 4 studies)<sup>92,107,108,112</sup> and led to changes in clinical management in 0.0%-14.9% of the cases found to be abnormal (N = 2 studies).<sup>108,112</sup>

**Coagulation Studies.** Routine coagulation studies reported abnormalities in bleeding time, prothrombin time, partial prothrombin time, or platelet count in 0.8-22.0% of cases (N = 15 studies)<sup>13,136,162,173-184</sup> and led to changes in clinical management in 1.1-4.0% of the cases found to be abnormal (N = 2 studies).<sup>13,136</sup> Findings for indicated coagulation studies were reported as abnormal in 3.4-29.1% of cases (N = 4 studies).<sup>183,185-187</sup> Changes in clinical management were not reported. The incidence of routine coagulation study abnormalities in patients scheduled for regional anesthesia or postoperative analgesia in surgical patients has not been reported. The incidence of routine coagulation study abnormalities in obstetric patients has not been reported.

**Serum Chemistries.** In routine preoperative potassium tests, abnormal levels of potassium were found in 1.5-12.8% of cases (N = 3 studies).<sup>133,162,188</sup> For indicated potassium tests, abnormal levels were found in 1.0-29.5% of cases (N = 4 studies).<sup>51,148,189,190</sup> One randomized clinical trial compared preoperative serum potassium levels at induction with serum potassium levels 3 days before surgery, and found lower potassium levels (hypokalemia) at induction.<sup>188</sup> No blinded studies were found that assessed the benefits or harms of practitioner awareness of potassium abnormalities.

In routine preoperative glucose tests in nondiabetic patients or patients without altered glucose metabolism, abnormal levels of glucose were found in 5.4-13.8% of cases (N = 3 studies).<sup>133,162,171</sup> Changes in clinical management were not reported.

**Urine Testing.** In routine preoperative urinalysis (not including pregnancy testing), abnormal results were reported in 0.7-38.0% of cases (N = 9 studies)<sup>92,96,102,136,162,170,172,191,192</sup> and led to changes in clinical management in 2.3-100% of the cases found to be abnormal (N = 6 studies).<sup>102,136,170,172,191,192</sup> For indicated urinalysis, abnormal results were found in 4.6-42.0% of cases (N = 4 studies)<sup>92,108,112,148</sup> and led to changes in clinical management in 0.0-23.1% of the cases found to be abnormal (N = 2 studies).<sup>108,112</sup>

**Pregnancy Testing.** Routine pregnancy tests (routine refers to premenopausal menstruating females, not excluding anyone on the basis of history) resulted in positive findings in 0.3-2.2% of cases (N = 5 studies)<sup>193-197</sup> and led to changes in clinical management, delays or cancellation of surgery in 100% of the cases found to be pregnant.

Consultants and ASA members were asked to consider whether specific preoperative tests should be conducted (1) on a routine basis (i.e., given to patients regardless of known or suspected diseases or disorders), (2) for selected patients or for selected types of surgery, or (3) the test is not necessary. For the tests considered, consultant and ASA membership responses are reported in table 3. Consultants and ASA members were also asked to identify specific patient characteristics that would favor a decision to order, require, or perform a preoperative test. For these specific patient characteristics, consultant and ASA membership responses are reported in table 4.

Consultants and ASA members were asked whether selected preoperative tests are acceptable if obtained from the patient's medical chart, assuming the patient's medical history has not changed substantially since the test was obtained. Majority opinions of consultants and ASA members are reported as percentage agreement, respectively, as follows:

1. Electrocardiogram (99%, 98%)
2. Other cardiac evaluation (94%, 98%)
3. Chest x-ray (97%, 92%)

**Table 3. Routine or Selective Preoperative Testing—Survey Opinions**

| Preoperative Test                          | All Patients (Routine)<br>% Agreement* | Selected Patients<br>% Agreement | Test Not Necessary<br>% Agreement |
|--------------------------------------------|----------------------------------------|----------------------------------|-----------------------------------|
| Electrocardiogram                          |                                        |                                  |                                   |
| Consultants (N = 72)                       | 0                                      | 100%                             | 0                                 |
| ASA members (N = 233)                      | 1%                                     | 98%                              | 1%                                |
| Cardiac tests other than electrocardiogram |                                        |                                  |                                   |
| Consultants (N = 72)                       | 0                                      | 97%                              | 0                                 |
| ASA members (N = 233)                      | 1%                                     | 99%                              | 0                                 |
| Chest x-rays                               |                                        |                                  |                                   |
| Consultants (N = 72)                       | 3%                                     | 90%                              | 7%                                |
| ASA members (N = 233)                      | 1%                                     | 92%                              | 6%                                |
| Pulmonary function tests                   |                                        |                                  |                                   |
| Consultants (N = 42)                       | 0                                      | 98%                              | 2%                                |
| ASA members (N = 234)                      | 0                                      | 96%                              | 3%                                |
| Office spirometry                          |                                        |                                  |                                   |
| Consultants (N = 42)                       | 0                                      | 88%                              | 10%                               |
| ASA members (N = 234)                      | 1%                                     | 63%                              | 20%                               |
| Hemoglobin/hematocrit                      |                                        |                                  |                                   |
| Consultants (N = 72)                       | 3%                                     | 96%                              | 1%                                |
| ASA members (N = 234)                      | 4%                                     | 95%                              | 1%                                |
| Coagulation studies                        |                                        |                                  |                                   |
| Consultants (N = 72)                       | 3%                                     | 94%                              | 1%                                |
| ASA members (N = 234)                      | 1%                                     | 98%                              | 1%                                |
| Serum chemistries                          |                                        |                                  |                                   |
| Consultants (N = 72)                       | 1%                                     | 99%                              | 0                                 |
| ASA members (N = 234)                      | 1%                                     | 99%                              | 0                                 |
| Urinalysis                                 |                                        |                                  |                                   |
| Consultants (N = 72)                       | 1%                                     | 53%                              | 46%                               |
| ASA members (N = 233)                      | 2%                                     | 47%                              | 49%                               |
| Pregnancy test                             |                                        |                                  |                                   |
| Consultants (N = 72)                       | 7%                                     | 88%                              | 5%                                |
| ASA members (N = 232)                      | 17%                                    | 78%                              | 3%                                |

\* Row percentages do not include "don't know" responses, therefore row totals may not equal 100%.

ASA = American Society of Anesthesiologists.

4. Hemoglobin/hematocrit (99%, 96%)
5. Coagulation studies (86%, 98%)
6. Serum chemistries (96%, 98%)

Respondents who agreed that test findings might be obtained from a patient's medical chart were asked how recent the findings should be in order to be acceptable. Opinions on how recent test findings should be are reported in table 5.

### Advisory

#### Routine Preoperative Testing

The current literature is not sufficiently rigorous to permit an unambiguous assessment of the clinical benefits or harms of routine preoperative tests. The studies examined by the Task Force reported a wide range of abnormal results associated with preoperative testing. When abnormal or positive results were found, the percentage of patients with subsequent changes in their clinical management varied widely.

The Task Force agrees with the consultants and ASA members that preoperative tests should not be ordered routinely. The Task Force agrees that preoperative tests may be ordered, required, or performed *on a selective basis* for purposes of guiding or optimizing perioperative management. The indications for such testing

should be documented and based on information obtained from medical records, patient interview, physical examination, and type and invasiveness of the planned procedure. Public commentary from open forums corroborates the Task Force consensus.

#### Preoperative Testing in the Presence of Specific Clinical Characteristics

The current literature is not sufficiently rigorous to permit an unambiguous assessment of the clinical benefits or harms associated with selected preoperative test findings. The studies examined by the Task Force reported a wide range of abnormal preoperative test results. In addition, when abnormal or positive results were found, the percentage of patients with subsequent changes in their clinical management varied widely. Few randomized controlled trials were found that examined the outcomes for patients who had *routine* preoperative tests compared with outcomes for patients with *indicated* preoperative tests.<sup>198</sup>

The Task Force believes that there is insufficient evidence to identify explicit decision parameters or rules for ordering preoperative tests on the basis of specific clinical characteristics. However, the Task Force believes that consideration of selected clinical characteris-

**Table 4. Patient Characteristics for Selected Preoperative Testing**

| Preoperative Test                                                        | Patient Characteristics                 | Consultants (N = 72)               | ASA Members (N = 234) |
|--------------------------------------------------------------------------|-----------------------------------------|------------------------------------|-----------------------|
| Electrocardiogram                                                        | Advanced age                            | 93%                                | 94%                   |
|                                                                          | Cardiocardulatory disease               | 97%                                | 98%                   |
|                                                                          | Respiratory disease                     | 74%                                | 74%                   |
| Other cardiac evaluation (e.g. stress test)                              | Cardiovascular compromise               | 88%                                | 95%                   |
|                                                                          | Chest radiograph                        | Recent upper respiratory infection | 45%                   |
| Pulmonary function tests                                                 | Smoking                                 | 42%                                | 60%                   |
|                                                                          | COPD                                    | 71%                                | 76%                   |
|                                                                          | Cardiac disease                         | 62%                                | 75%                   |
|                                                                          | Reactive airway disease                 | 68%                                | 71%                   |
|                                                                          | COPD                                    | 80%                                | 89%                   |
| Office spirometry (i.e. portable spirometer)                             | Scoliosis                               | 53%                                | 60%                   |
|                                                                          | Reactive airway disease                 | 83%                                | 86%                   |
|                                                                          | COPD                                    | 77%                                | 90%                   |
| Hemoglobin/hematocrit                                                    | Scoliosis                               | 51%                                | 52%                   |
|                                                                          | Advanced age                            | 57%                                | 68%                   |
|                                                                          | Very young age                          | 52%                                | 56%                   |
|                                                                          | Anemia                                  | 96%                                | 99%                   |
| Coagulation studies                                                      | Bleeding disorders                      | 93%                                | 94%                   |
|                                                                          | Other hematological disorders           | 74%                                | 84%                   |
|                                                                          | Bleeding disorders                      | 99%                                | 98%                   |
|                                                                          | Renal dysfunction                       | 40%                                | 52%                   |
|                                                                          | Liver dysfunction                       | 97%                                | 91%                   |
| Serum chemistries (sodium, potassium, carbon dioxide, chloride, glucose) | Anticoagulants                          | 97%                                | 96%                   |
|                                                                          | Endocrine disorders                     | 93%                                | 95%                   |
|                                                                          | Renal dysfunction                       | 96%                                | 98%                   |
|                                                                          | Medications                             | 87%                                | 89%                   |
| Pregnancy test                                                           | Uncertain pregnancy history             | 84%                                | 91%                   |
|                                                                          | History suggestive of current pregnancy | 94%                                | 96%                   |

ASA = American Society of Anesthesiologists; COPD = chronic obstructive pulmonary disease.

tics may assist the anesthesiologist when deciding to order, require, or perform preoperative tests. The following clinical characteristics may be of merit, although anesthesiologists should not limit their consideration only to those suggested below.

**Electrocardiogram.** The Task Force agrees that important clinical characteristics may include cardiocardulatory disease, respiratory disease, and type or invasive-

ness of surgery. The Task Force recognizes that electrocardiogram abnormalities may be higher in older patients and in patients with multiple cardiac risk factors.

No consensus was obtained from the consultants and ASA membership regarding a minimum age for obtaining a preanesthesia electrocardiogram. The Task Force did not reach consensus on a specific minimum age in those

**Table 5. Timing of Test Findings—Survey Opinions**

| Preoperative Test     | 24 h                  | 48 h | 1 wk | 2 wk | 1 mo | 3 mo | 6 mo | 1 yr | >1 yr |     |
|-----------------------|-----------------------|------|------|------|------|------|------|------|-------|-----|
| Electrocardiogram     | Consultants (N = 72)  | 0    | 0    | 4%   | —    | 31%  | —    | 46%  | 19%   | 0   |
|                       | ASA members (N = 218) | 1%   | 0    | 6%   | —    | 34%  | —    | 45%  | 12%   | 2%  |
| Other cardiac tests   | Consultants (N = 72)  | 0    | 0    | 5%   | —    | 33%  | —    | 27%  | 26%   | 10% |
|                       | ASA members (N = 217) | 0    | 0    | 7%   | —    | 33%  | —    | 40%  | 18%   | 4%  |
| Chest x-ray           | Consultants (N = 72)  | 0    | 5%   | 5%   | —    | 25%  | 23%  | 19%  | 23%   | —   |
|                       | ASA members (N = 206) | 0    | 2%   | 8%   | —    | 27%  | 9%   | 31%  | 23%   | —   |
| Hemoglobin/hematocrit | Consultants (N = 72)  | —    | —    | 14%  | 8%   | 42%  | 23%  | 8%   | 5%    | —   |
|                       | ASA members (N = 213) | —    | —    | 13%  | 11%  | 46%  | 17%  | 11%  | 1%    | —   |
| Coagulation studies   | Consultants (N = 42)  | 28%  | 11%  | 30%  | 6%   | 19%  | 6%   | —    | —     | —   |
|                       | ASA members (N = 194) | 33%  | 16%  | 26%  | 6%   | 16%  | 4%   | —    | —     | —   |
| Serum chemistries     | Consultants (N = 72)  | 15%  | 7%   | 27%  | 17%  | 27%  | 7%   | —    | —     | —   |
|                       | ASA members (N = 203) | 11%  | 12%  | 26%  | 9%   | 34%  | 7%   | —    | —     | —   |

ASA = American Society of Anesthesiologists.

patients without specific risk factors. The Task Force recognizes that age alone may not be an indication for an electrocardiogram. The Task Force agrees that an electrocardiogram may be indicated for patients with known cardiovascular risk factors or for patients with risk factors identified in the course of a preanesthesia evaluation.

**Preanesthesia Cardiac Evaluation (other than Electrocardiogram).** Preanesthesia cardiac evaluation may include consultation with specialists and ordering, requiring, or performing tests that range from noninvasive passive or provocative screening tests (*e.g.*, stress testing) to noninvasive and invasive assessment of cardiac structure, function, and vascularity (*e.g.*, echocardiogram, radionuclide imaging, cardiac catheterization). Anesthesiologists should balance the risks and costs of these evaluations against their benefits. Clinical characteristics to consider include cardiovascular risk factors and type of surgery.

**Preanesthesia Chest Radiographs (X-ray).** Clinical characteristics to consider include smoking, recent upper respiratory infection, chronic obstructive pulmonary disease (COPD), and cardiac disease. The Task Force recognizes that chest radiographic abnormalities may be higher in such patients, but does not believe that extremes of age, smoking, stable COPD, stable cardiac disease, or resolved recent upper respiratory infection should be considered unequivocal indications for chest radiography.

**Preanesthesia Pulmonary Evaluation (other than Chest X-ray).** Preanesthesia pulmonary evaluation other than chest x-ray may include consultation with specialists and tests that range from noninvasive passive or provocative screening tests (*e.g.*, pulmonary function tests, spirometry, pulse oximetry) to invasive assessment of pulmonary function (*e.g.*, arterial blood gas). Anesthesiologists should balance the risks and costs of these evaluations against their benefits. Clinical characteristics that the Task Force believes should be considered include type and invasiveness of the surgical procedure, interval from prior evaluation, treated or symptomatic asthma, symptomatic COPD, and scoliosis with restrictive function.

**Preanesthesia Hemoglobin or Hematocrit.** The Task Force believes that routine hemoglobin or hematocrit is not indicated. Clinical characteristics to consider as indications for such tests include type and invasiveness of procedure, patients with liver disease, extremes of age, history of anemia, bleeding, and other hematologic disorders.

**Preanesthesia Coagulation Studies (*e.g.*, INR, PT, PTT, platelets).** Clinical characteristics to consider for ordering selected coagulation studies include bleeding disorders, renal dysfunction, liver dysfunction, and type and invasiveness of procedure. The Task Force recognizes that anticoagulant medications and alternative ther-

apies may present an additional perioperative risk. The Task Force believes that there were not enough data to comment on the advisability of coagulation tests before regional anesthesia. The Task Force strongly recommends appropriately controlled studies of such specific indications.

**Preanesthesia Serum Chemistries (*i.e.*, Potassium, Glucose, Sodium, Renal and Liver Function Studies).** The Task Force recognizes that laboratory values may differ from normal values at extremes of age. Clinical characteristics to consider before ordering such tests include likely perioperative therapies, endocrine disorders, risk of renal and liver dysfunction, and use of certain medications or alternative therapies.

**Preanesthesia Urinalysis.** The consensus of the Task Force is that urinalysis is not indicated except for specific procedures (*e.g.*, prosthesis implantation, urologic procedures) or when urinary tract symptoms are present.

**Preanesthesia Pregnancy Testing.** The Task Force recognizes that a history and physical examination may be insufficient for identification of early pregnancy. Pregnancy testing may be *considered* for all female patients of childbearing age. Clinical characteristics to consider include an uncertain pregnancy history or a history suggestive of current pregnancy.

#### *Timing of Preoperative Testing*

The current literature is not sufficiently rigorous to permit an unambiguous assessment of the clinical benefits or harms of the timing for preoperative tests. The Task Force believes that there is insufficient evidence to identify explicit decision parameters or rules for ordering preoperative tests on the basis of specific patient factors.

The Task Force believes that test results obtained from the medical record within 6 months of surgery are generally acceptable if the patient's medical history has not changed substantially. More recent test results may be desirable when the medical history has changed, or when test results may play a role in the selection of a specific anesthetic technique (*e.g.*, regional anesthesia in the setting of anticoagulation therapy.) Public commentary from open forums and from the Internet corroborates the Task Force consensus.

## Summary and Conclusions

A preanesthesia evaluation involves the assessment of information from multiple sources, including medical records, patient interviews, physical examinations, and findings from preoperative tests.

The current scientific literature does not contain sufficiently rigorous information about the components of a preanesthesia evaluation to permit recommendations



that are unambiguously based. Therefore, the Task Force has relied primarily upon noncontrolled literature, opinion surveys of consultants, and opinion surveys of a random sample of members of the ASA. The focus of opinion surveys has been threefold (1) the content of the preanesthesia evaluation, (2) the timing of the preoperative evaluation, and (3) the indications for specific preoperative tests.

The following remarks represent a synthesis of the opinion surveys, literature and Task Force consensus:

1. *Content* of the preanesthesia evaluation includes but is not limited to (1) readily accessible medical records, (2) patient interview, (3) a directed preanesthesia examination, (4) preoperative tests when indicated, and (5) other consultations when appropriate. At a *minimum*, a directed preanesthesia physical examination should include an assessment of the airway, lungs, and heart.
2. *Timing* of the preanesthesia evaluation can be guided by considering combinations of surgical invasiveness and severity of disease, as shown in table 2. The Task Force cautions that limitations in resources available to a specific healthcare system or practice environment may impact the timing of the preanesthesia evaluation. The healthcare system is obligated to provide pertinent information to the anesthesiologist for the appropriate assessment of the invasiveness of the proposed surgical procedure and the severity of the patient's medical condition well in advance of the anticipated day of procedure for all elective patients.
3. *Routine preoperative tests* (i.e., tests intended to discover a disease or disorder in an asymptomatic patient) do not make an important contribution to the process of perioperative assessment and management of the patient by the anesthesiologist.
4. *Selective preoperative tests* (i.e., tests ordered after consideration of specific information obtained from sources such as medical records, patient interview, physical examination, and the type or invasiveness of the planned procedure and anesthesia) may assist the anesthesiologist in making decisions about the process of perioperative assessment and management.
5. *Decision-making parameters* for specific preoperative tests or for the timing of preoperative tests cannot be unequivocally determined from the available scientific literature. Further research is needed, preferably in the form of appropriately randomized clinical trials. Specific tests and their timing should be individualized and based upon information obtained from sources such as the patient's medical record, patient interview, physical examination, and the type and invasiveness of the planned procedure.

The references listed here do not represent a complete bibliography of the literature reviewed. A complete bibliography is available by writing to the American Society of Anesthesiologists or by accessing the ANESTHESIOLOGY Web site: <http://www.anesthesiology.org>.

## References

1. Bando K, Sun K, Binford RS, Sharp T: Determinants of longer duration of endotracheal intubation after adult cardiac operations. *Ann Thorac Surg* 1997; 63:1026-33
2. Biavati M, Manning SC, Phillips DL: Predictive factors for respiratory complications after tonsillectomy and adenoidectomy in children. *Arch Otolaryngol Head Neck Surg* 1997; 123:517-21
3. Blake DW, McGrath BP, Donnan GB, Smart S, Way D, Myers KA, Fullerton M: Influence of cardiac failure on atrial natriuretic peptide responses in patients undergoing vascular surgery. *European J Anaesth* 1991; 8:365-71
4. Brooks-Brunn JA: Predictors of postoperative pulmonary complications following abdominal surgery. *Chest* 1997; 111:564-71
5. Brummett C, Reves JG, Lell WA, Smith LR: Patient care problems in patients undergoing reoperation for coronary artery grafting surgery. *Can Anaesth Soc J* 1984; 31:213-20
6. Bruton NH, Maree SM: A case approach: The pathophysiology of thyroid storm. *Aana J* 51:295-1983;301:303
7. Burgos LG, Ebert TJ, Asiddao C, Turner LA, Pattison CZ, Wang Cheng R, Kampine JP: Increased intraoperative cardiovascular morbidity in diabetics with autonomic neuropathy. *ANESTHESIOLOGY* 1989; 70:591-7
8. Burrows FA, Hickey PR, Colan S: Perioperative complications in patients with anthracycline chemotherapeutic agents. *Can Anaesth Soc J* 1985; 32:149-57
9. Calverley RK, Johnston AE: The anaesthetic management of tracheo-oesophageal fistula: a review of ten years' experience. *Can Anaesth Soc J* 1972; 19:270-82
10. Carson JM, Van Sickels JE: Preoperative determination of susceptibility to malignant hyperthermia. *J Oral Maxillofac Surg* 1982; 40:432-5
11. Charlson ME, MacKenzie CR, Gold JP, Ales KL, Shires GT: Postoperative renal dysfunction can be predicted. *Surgery, Gynecol Obstet* 1989; 169:303-9
12. Clarke Pearson DL, DeLong ER, Synan IS, Coleman RE, Creasman WT: Variables associated with postoperative deep venous thrombosis: a prospective study of 411 gynecology patients and creation of a prognostic model. *Obstet Gynecol* 1987; 69:146-50
13. Close HL, Kryzer TC, Nowlin JH, Alving BM: Hemostatic assessment of patients before tonsillectomy: a prospective study. *Otolaryngol Head Neck Surg* 1994; 111:733-8
14. Cohen MM, Cameron CB: Should you cancel the operation when a child has an upper respiratory tract infection? *Anesth Analg* 1991; 72:282-8
15. Cullen DJ, Apolone G, Greenfield S, Guadagnoli E, Cleary P: ASA Physical Status and age predict morbidity after three surgical procedures. *Ann Surg* 1994; 220:3-9
16. Diaz JH: Halothane anesthesia in infancy: identification and correlation of preoperative risk factors with intraoperative arterial hypotension and postoperative recovery. *J Pediatr Surg* 1985; 20:502-7
17. Dorrington KL: Asystole with convulsion following a subanesthetic dose of propofol plus fentanyl. *Anaesthesia* 1989; 44:658-9
18. Dripps RD, Lamont A, Eckenhoff JE: The role of anesthesia in surgical mortality. *JAMA* 1961; 178:261-6
19. Dudley JC, Brandenburg JA, Hartley LH, Harris S, Lee TH: Last-minute preoperative cardiology consultations: epidemiology and impact. *Am Heart J* 1996; 131:245-9
20. Duncan PG, Cohen MM, Tweed WA, Bieh D, Pope WD, Merchant RN, DeBoer D: The Canadian four-centre study of anaesthetic outcomes: III. Are anaesthetic complications predictable in day surgical practice? *Can J Anaesth* 1992; 39:440-8
21. Duncan PG, Cohen MM: Postoperative complications: factors of significance to anaesthetic practice. *Can J Anaesth* 1987; 34:2-8
22. Forrest JB, Rehder K, Cahalan MK, Goldsmith CH: Multicenter study of general anesthesia. III. Predictors of severe perioperative adverse outcomes [published erratum appears in *Anesthesiology* 1992 Jul;77(1):222]. *ANESTHESIOLOGY* 1992; 76:3-15
23. Garibaldi RA, Britt MR, Coleman ML, Reading JC, Pace NL: Risk factors for postoperative pneumonia. *Am J Med* 1981; 70:677-80
24. Goldman L, Caldera DL, Southwick FS, Nussbaum SR, Murray B, O'Malley TA, Goroll AH, Caplan CH, Nolan J, Burke DS, Krogstad D, Carabello B, Slater EE: Cardiac risk factors and complications in non-cardiac surgery. *Medicine* 1978; 57:357-70
25. Greaves SC, Rutherford JD, Aranki SF, Cohn LH, Couper GS, Adams DH, Rizzo RJ, Collins JJ, Antman EM: Current incidence and determinants of perioperative myocardial infarction in coronary artery surgery. *Am Heart J* 1996; 132:572-8
26. Horlocker TT, Wedel DJ, Offord KP: Does preoperative antiplatelet therapy increase the risk of hemorrhagic complications associated with regional anesthesia? *Anesth Analg* 1990; 70:631-4

27. Hovagim AR, Vitkum SA, Manacke GR, Reiner R: Arterial oxygen desaturation in adult dental patients receiving conscious sedation. *J Oral Maxill ac Surg* 1989; 47:936-9
28. Hubbert CH, Adams JG: Anesthetic management of patients with epidermolysis bullosa. *South Med J* 1977; 70:1375-7
29. Kleinman B, Czinn E, Shah K, Sobotka PA, Rao TK: The value to the anesthesia-surgical care team of the preoperative cardiac consultation. *J Cardiothorac Anesth* 1989; 3:682-7
30. Kroenke K, Lawrence VA, Theroux JF, et al.: Postoperative complications after thoracic and major abdominal surgery in patients with and without obstructive lung disease. *Chest* 1993; 104:1445-51
31. Kurki TSO, Kataja M: Preoperative prediction of postoperative morbidity in coronary artery bypass grafting. *Ann Thorac Surg* 1996; 61:1740-5
32. Lawrence VA, Dhanda R, Hilsenbeck SG, Page CP: Risk of pulmonary complications after elective abdominal surgery. *Chest* 1996; 110(3):744-50
33. Leung JM, Hollenberg M, O'Kelly BF, Kao A, Mangano DT: Effects of steal-prone anatomy on intraoperative myocardial ischemia. The SPI Research Group. *J Am Coll Cardiol* 1992; 20:1205-12
34. Luebke NH, Walker JA: Discussion of sensitivity to preservatives in anesthetics. *J Am Dental Assoc* 1978; 97:656-7
35. Michelson JD, Lotke PA, Steinberg ME: Urinary-bladder management after total joint-replacement surgery. *N Eng J Med* 1988; 319:321-6
36. Mudge BJ, Taylor PB, Vanderspek AF: Perioperative hazards in myotonic dystrophy. *Anaesthesia* 1980; 35:492-5
37. Naef RW3, Chauhan SP, Chevalier SP, Roberts WE, Meydrech EF, Morrison JC: Prediction of hemorrhage at cesarean delivery. *Obstet Gynecol* 1994; 83:923-6
38. Neuman GG, Baldwin CC, Petrini AJ, Wise L, Wollman SB: Perioperative management of a 430-kilogram (946-pound) patient with Pickwickian syndrome. *Anesth Analg* 1986; 65:985-7
39. Olsson GL: Bronchospasm during anaesthesia. A computer-aided incidence study of 136,929 patients. *Acta Anaesth Scand* 1987; 31:244-52
40. Paul SD, Eagle KA, Kuntz KM, Young JR, Hertzner NR: Concordance of preoperative clinical risk with angiographic severity of coronary artery disease in patients undergoing vascular surgery. *Circulation* 1996; 94:1561-6
41. Pedersen T, Eliassen K, Henriksen E: A prospective study of risk factors in cardiopulmonary complications associated with anaesthesia and surgery: risk indicators of cardiopulmonary morbidity. *Acta Anaesth Scand* 1990; 34:144-55
42. Pedersen T, Viby Mogensen J, Ringsted C: Anaesthetic practice and postoperative pulmonary complications. *Acta Anaesth Scand* 1992; 36:812-8
43. Phillips EH, Carroll BJ, Fallas MJ, Pearlstein AR: Comparison of laproscopic cholecystectomy in obese and non-obese patients. *Am Surg* 1994; 60:316-21
44. Plaugher ME: Emergent exploratory laparotomy for a patient with recent Guillain-Barré recurrence: a case report. *AANA J* 1994; 62:437-40
45. Poe RH, Kallay MC, et al.: Can postoperative pulmonary complications after elective cholecystectomy be predicted? *Am J Med Sci* 1988; 295:29-34
46. Rao MK, Reilly TE, Schuller DE, Young DC: Analysis of risk factors for postoperative pulmonary complications in head and neck surgery. *Laryngoscope* 1992; 102:45-7
47. Ravin M, Newmark Z, Saviello G: Myotonia dystrophica—an anesthetic hazard: two case reports. *Anesth Analg* 1975; 54:216-8
48. Royster RL, Butterworth JF4, Prough DS, et al.: Preoperative and intraoperative predictors of inotropic support and long-term outcome in patients having coronary artery bypass grafting. *Anesth Analg* 1991; 72:729-36
49. Sandler G: Costs of unnecessary tests. *BMJ* 1979; 2:21-4
50. Schweizer P, Warth H, Leriche C: Studies to be conducted before projected operations from the pediatric surgeon's point of view. *Eur J Pediatr Surg* 1991; 1:135-8
51. Shah KB, Kleinman BS, Rao TL, Jacobs HK, Mestan K, Schaafsma M: Angina and other risk factors in patients with cardiac diseases undergoing noncardiac operations. *Anesth Analg* 1990; 70:240-7
52. Skolnick ET, Vomvolakis MA, Buck KA, Mannino SF, Sun LS: Exposure to environmental tobacco smoke and the risk of adverse respiratory events in children receiving general anesthesia. *ANESTHESIOLOGY* 1998; 88:1144-53
53. Steen PA, Tinker JH, Tarhan S: Myocardial reinfarction after anesthesia and surgery. *JAMA* 1978; 239:2566-70
54. Svensson LG, Hess KR, Coselli JS, Safi HJ, Crawford S: A prospective study of respiratory failure after high-risk surgery on the thoracoabdominal aorta. *J Vasc Surg* 1991; 14:271-82
55. Tait AR, Knight PR: The effects of general anesthesia on upper respiratory tract infections in children. *ANESTHESIOLOGY* 1987; 67:930-5
56. Vanzetto G, Machecourt J, Blendea D, Fagret D, Borrel E, Magne JL, Gattaz F, Guidicelli H: Additive value of thallium single-photon emission computed tomography myocardial imaging for prediction of perioperative events in clinically selected high cardiac risk patients having abdominal aortic surgery. *Am J Cardiol* 1996; 77:143-8
57. Velanovich V: Preoperative screening electrocardiography: predictive value for postoperative cardiac complications. *Southern Med J* 1994; 87:431-4
58. von Knorring J: Postoperative myocardial infarction: a prospective study in a risk group of surgical patients. *Surgery* 1981; 90:55-60
59. Waga S, Shimosaka S, Sakakura M: Intracerebral hemorrhage remote from the site of the initial neurosurgical procedure. *Neurosurgery* 1983; 13:662-5
60. Warner MA, Offerd KP, Warner ME, Lennon RL, Conover MA, Jansson Schumacher U: Role of preoperative cessation of smoking and other factors in postoperative pulmonary complications: a blinded prospective study of coronary artery bypass patients. *Mayo Clin Proc* 1989; 64:609-16
61. Wightman JA: A prospective survey of the incidence of postoperative pulmonary complications. *Br J Surg* 1968; 55:85-91
62. Wong DH, Weber EC, Schell MJ, Wong AB, Anderson CT, Barker SJ: Factors associated with postoperative pulmonary complications in patients with severe chronic obstructive pulmonary disease. *Anesth Analg* 1995; 80:276-84
63. Yagiela JA: Preoperative assessment of patients for conscious sedation and general anesthesia. *Anesth Prog* 1986; 33:178-81
64. Burman AL: A pre-anaesthetic clinic. *S Afr Med J* 1968; 42:315-7
65. Clark SK, Leighton BL, Seltzer JL: A risk-specific anesthesia consent form may hinder the informed consent process. *J Clin Anesth* 1991; 3:11-3
66. Cohen MM, Duncan PG: Physical status score and trends in anesthetic complications. *J Clin Epidemiol* 1988; 41:83-90
67. Baxter MA: Acromegaly and transphenoidal hypophysectomy: a case report. *Aana J* 1994; 62:182-5
68. Belani KG, Krivit W, Carpenter BL, Braunlin E, Buckley JJ, Liao JC, Floyd T, Leonard AS, Summers CG, : Children with mucopolysaccharidosis: perioperative care, morbidity, mortality, and new findings. *J Pediatr Surg* 1993; 28:403-8
69. Bissonnette B, Sullivan PJ: Pyloric stenosis. *Can J Anaesth* 1991; 38:668-76
70. Chan VW, Tindal S: Anaesthesia for transphenoidal surgery in a patient with extreme gigantism. *Br J Anaesth* 1988; 60:464-8
71. Chung F, Crago RR: Sleep apnoea syndrome and anaesthesia. *Can Anaesth Soc J* 1982; 29:439-45
72. Cole RR, Cotton RT: Preventing postoperative complications in the adult cystic fibrosis patient. *Int J Pediatr Otorhinolaryngol* 1990; 18:263-9
73. Eikenbary KF: Pyloric stenosis: its anesthetic management and a case study. *AANA J* 1978; 46:517-21
74. Fox M, Courtney S, Wilkinson PA: Mortality and morbidity of prostatectomy. How far does preselection and pre-operative care influence the result? *Eur Urol* 1991; 20:277-81
75. Galloway JA, Shuman CR: Profile, specific methods of management, and response of diabetic patients to anesthesia and surgery. *Int Anesth Clin* 1967; 5:437-66
76. Hannon VM, Cunningham AJ, Hutchinson M, McNicholas W: Aspiration pneumonia and coma—an unusual presentation of dystrophic myotonia. *Can Anaesth Soc J* 1986; 33:803-6
77. Jastak JT, Peskin RM: Major morbidity or mortality from office anesthetic procedures: a closed-claim analysis of 13 cases. *Anesth Prog* 1991; 38:39-44
78. Kelsey M: Ophthalmic medications, glaucoma, and the surgical patient. *J Post-Anesth Nursing* 1992; 7:312-6
79. Kitahata LM: Airway difficulties associated with anaesthesia in acromegaly. Three case reports. *Br J Anaesth* 1971; 43:1187-90
80. Lai CS, Lin SD, Yang CC, Chou CK, Tsai CW: Tracheal deviation: an unusual complication of platysma myocutaneous flap. *Kao-Hsiung I Hsueh Ko Hsueh Tsai Chih [Kaohsiung J Of Med Sciences]* 1993; 9:118-21
81. Malan MD, Crago RR: Anaesthetic considerations in idiopathic orthostatic hypotension and the Shy-Drager syndrome. *Can Anaesth Soc J* 1979; 26:322-7
82. McKee RF, Scott EM: The value of routine preoperative investigations. *Annals Royal Col Surg* 1987; 69:160-2
83. Patel RI, Hannallah RS: Preoperative screening for pediatric ambulatory surgery: evaluation of a telephone questionnaire method. *Anesth Analg* 1992; 75:258-61
84. Prause G, Ratzehofer-Komenda B, Smolle-Juettner F, Krenn H, Pojer H, Toller W, Voit H, Offner A, Smolle J: Operations on patients deemed "unfit for operation and anaesthesia": what are the consequences? *Acta Anaesth Scand* 1998; 42:316-22
85. Putnam LP: Pseudocholinesterase deficiency: an additional preoperative consideration in outpatient diagnostic procedures. *South Med J* 1977; 70:831-2
86. Rockoff AS, Christy D, Zeldis N, Tsai DJ, Kramer RA: Myocardial necrosis following general anesthesia in hemoglobin SC disease. *Pediatrics* 1978; 61:73-6
87. Rodriguez R, Herrin TJ, Hendrickson M: Cardiac and thoracic vascular injuries: anesthetic considerations. *South Med J* 1980; 73:739-41
88. Rosenblatt MA, Bradford C, Miller R, Zahl K: A preoperative interview by an anesthesiologist does not lower preoperative anxiety in outpatients. *ANESTHESIOLOGY* 1989; 71:A926
89. Tobias JD, Lowe S, Holcomb GW3: Anesthetic considerations of an infant with Beckwith-Wiedemann syndrome. *J Clin Anesth* 1992; 4:484-6
90. Wehner RJ, McKennett RJ: A case study: management of the patient with laryngeal tumor and airway compromise. *Aana J* 1982; 50:81-3
91. Wittmann FW, Ring PA: Anaesthesia for hip replacement in ankylosing spondylitis. *J Royal Soc Med* 1986; 79:457-9
92. Adams JG, Weigelt JA, Poulos E: Usefulness of preoperative laboratory assessment of patients undergoing elective herniorrhaphy. *Arch Surg* 1992; 127:801-5
93. Callaghan LC, Edwards ND, Reilly CS: Utilisation of the pre-operative ECG. *Anaesthesia* 1995; 50:488-90
94. Fleisher LA, Rosenbaum SH, Nelson AH, Jain D, Wackers FJT, Zaret BL: Preoperative dipyridamol thallium imaging and ambulatory electrocardiographic monitoring as a predictor of perioperative cardiac events and long-term outcome. *ANESTHESIOLOGY* 1995; 83:906-17
95. Gold BS, Young ML, Kinman JL, Kitz DS, Berlin J, Schwartz JS: The utility



158. Jacob B, Amoateng-Adjepong Y, Rasakulasurir S, Manthous CA, Haddad R: Preoperative pulmonary function tests do not predict outcome after coronary artery bypass. *Conn Med* 1997; 61(6):327-32
159. Vedantam R, Crawford AH: The role of preoperative pulmonary function tests in patients with adolescent idiopathic scoliosis undergoing posterior spinal fusion. *Spine* 1997; 22:2731-4
160. Kispert JF, Kazmers A, Roitman L: Preoperative spirometry predicts perioperative pulmonary complications after major vascular surgery. *Am Surg* 1992; 58:491-5
161. Hackmann T, Steward DJ, Sheps SB: Anemia in pediatric day-surgery patients: prevalence and detection. *ANESTHESIOLOGY* 1991; 75:27-31
162. Harris EJ: Usefulness of preoperative testing in pediatric podiatric surgery. Does it influence clinical decisions? *Clin Podiatric Med & Surg* 1997; 14(1):149-78
163. Jones MW, Harvey IA, Owen R: Do children need routine preoperative blood tests and blood cross matching in orthopaedic practice? *Ann Royal Coll Surg Eng* 1989; 71:1-3
164. Narr BJ, Hansen TR, Warner MA: Preoperative laboratory screening in health screening in healthy Mayo patients: Cost-effective elimination of tests and unchanged outcomes. *Mayo Clin Proc* 1991; 66:155-9
165. Roy WL, Lerman J, McIntyre BG: Is preoperative haemoglobin testing justified in children undergoing minor elective surgery? *Can J Anaesth* 1991; 38(6):700-3
166. Keating EM, Meding JB, Faris PM, Ritter MA: Predictors of transfusion risk in elective knee surgery. *Clin Orthop* 1998; 357:50-5
167. Swetech SM, Conlon JW, Messana AS: Common features associated with spinal-anesthesia-induced hypotension: a retrospective study. *J Am Osteopath Assoc* 1991; 91:1195-8, 1201-2, 1205-8
168. Baron MJ, Gunter J, White P: Is the pediatric preoperative hematocrit determination necessary. *South Med J* 1992; 85:1187-9
169. Gold BD, Wolfersberger WH: Findings from routine urinalysis and hematocrit on ambulatory oral and maxillofacial surgery patients. *J Oral Surg* 1980; 38:677-8
170. Haug RH, Reifeis RL: A prospective evaluation of the value of preoperative laboratory testing for office anesthesia and sedation. *J Oral Maxillfac Surg* 1999; 57(1):16-20
171. Kaplan EB, Sheiner LB, Boeckmann AJ, et al.: The usefulness of preoperative laboratory screening. *JAMA* 1985; 253:3576-81
172. O'Connor ME, Drasner K: Preoperative laboratory testing of children undergoing elective surgery. *Anesth Analg* 1990; 70:176-80
173. Aghajanian A, Grimes DA: Routine prothrombin time determination before elective gynecologic operations. *Obstet Gynecol* 1991; 78(5):837-9
174. Bolger, WE, Parsons DS, Potempa L: Preoperative hemostatic assessment of the adenotonsillectomy patient. *Otolaryngol Head Neck Surg* 1990; 103:396-405
175. Burk CD, Miller L, Handler SD, Cohen AR: Preoperative history and coagulation screening in children undergoing tonsillectomy. *Pediatrics* 1992; 89(4):691-5
176. Eisenberg JM, Clarke JR, Sussman SA: Prothrombin and partial thromboplastin times as preoperative screening tests. *Arch Surg* 1982; 117:48-51
177. Eisenberg JM, Goldfarb S: Clinical usefulness of measuring prothrombin time as a routine admission test. *Clin Chem* 1976; 22:1644-7
178. Erban SB, Kinman JL, Schwartz S: Routine use of the prothrombin and partial thromboplastin times. *JAMA* 1989; 262:2428-32
179. Houry S, Georgeac C, Hay JM, Fingerhut A, Boudet MJ: A prospective multicenter evaluation of preoperative hemostatic screening tests. *Am J Surg* 1995; 170:19-23
180. Korte W, Truttman B, Heim C, Stangl U, Schmid L, Kreienbuhl G: Preoperative values of molecular coagulation markers identify patients at low risk for intraoperative haemostatic disorders and excessive blood loss. *Clin Chem Lab Med* 1998; 36:235-40
181. Kozak EA, Brath LK: Do "screening" coagulation tests predict bleeding in patients undergoing fiberoptic bronchoscopy with biopsy? *Chest* 1994; 106:703-5
182. Robbins JA, Rose SD: Partial thromboplastin time as a screening test. *Ann Int Med* 1979; 90:796-7
183. Rohrer MJ, Michelotti MC, Nahwold DL: A prospective evaluation of the efficacy of preoperative coagulation testing. *Ann Surg* 1988; 208:554-7
184. Tami TA, Parker GS, Taylor RE: Post-tonsillectomy bleeding: an evaluation of risk factors. *Laryngoscope* 1987; 97:1307-11
185. Myers ER, Clarke-Pearson DL, Olt GJ, Soper JT, Berchuck A: Preoperative coagulation testing on a gynecologic oncology service. *Obstet Gynecol* 1994; 83:438-44
186. Rader ES: Hematologic screening tests in patients with operative prostatic disease. *Urology* 1978; 9:243-6
187. Wojtkowski TA, Rutledge JC, Matthews DC: The clinical impact of increased sensitivity PT and APTT coagulation assays. *Am J Clin Pathol* 1999; 112:225-32
188. Kharasch ED, Bowdle TA: Hypokalemia before induction of anesthesia and prevention by beta 2 adrenoceptor antagonism. *Anesth Analg* 1991; 72:216-20
189. Hirsch IA, Tomlinson DL, Slogoff S, Keats AS: The overstated risk of preoperative hypokalemia. *Anesth Analg* 1988; 67:131-6
190. Wahr JA, Parks R, Boisgvert D, Comunale M, Fabian J, Ramsay J, Mangano DT: Preoperative serum potassium levels and perioperative outcomes in cardiac surgery patients. Multicenter Study of Perioperative Ischemia Research Group. *JAMA* 1999; 281:2203-10
191. Akin BV, Hubbell FA, Frye EB, Rucker L, Friis R: Efficacy of the routine admission urinalysis. *Am J Med* 1987; 82:719-22
192. Sanders DP, McKinney FW, Harris WH: Clinical evaluation and cost effectiveness of preoperative laboratory assessment on patients undergoing total hip arthroplasty. *Orthopedics* 1989; 12:1449-53
193. Azzam FJ, Gurpreet SP, DeBoard JW, Krock JL, Kolterman SM: Preoperative pregnancy testing in adolescents. *Anesth Analg* 1996; 82:4-7
194. Manley S, de Kelaita G, Joseph NJ, Salem R, Heyman HJ: Preoperative pregnancy testing in ambulatory surgery. *ANESTHESIOLOGY* 1995; 83:690-3
195. Pierre N: Evaluation of a pregnancy-testing protocol in adolescents undergoing surgery. *J Pediatr Adolesc Gynecol* 1998; 11:139-41
196. Twersky RS, Singleton G: Preoperative pregnancy testing: "Justice and testing for all". *Anesth Analg* 1996; 83:438-9
197. Wheeler M, Cote CJ: Preoperative pregnancy testing in a tertiary care children's hospital: a medico-legal conundrum. *J Clin Anesth* 1999; 11:56-63
198. Schein OD, Katz J, Bass EB, Tielsch JM, Lubomski LH, Feldman MA, Petty BG, Steinberg EP: The value of routine preoperative medical testing before cataract surgery. *NEJM* 2000; 342:168-75
